# Supplementary material for: Numerical modeling of the dynamics of the Mer de Glace glacier, French Alps: comparison with past observations and forecasting of near-future evolution
Source: Copernicus journal article supplement (doi:10.5194/tc-14-3979-2020), 2020-11-13
Supplement: Supplementary file [file tc-14-3979-2020-supplement.pdf]

Supplement of The Cryosphere, 14, 3979–3994, 2020  
<https://doi.org/10.5194/tc-14-3979-2020-supplement>  
© Author(s) 2020. This work is distributed under  
the Creative Commons Attribution 4.0 License.

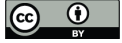

*Supplement of*

## **Numerical modeling of the dynamics of the Mer de Glace glacier, French Alps: comparison with past observations and forecasting of near-future evolution**

**Vincent Peyaud et al.**

*Correspondence to:* Vincent Peyaud ([vincent.peyaud@univ-grenoble-alpes.fr](mailto:vincent.peyaud@univ-grenoble-alpes.fr))

The copyright of individual parts of the supplement might differ from the CC BY 4.0 License.

## List of climatic simulations

The climatic models (GCM + RCM) are listed in the Table S1. For the Hindcast we use a simulation from the SAFRAN model (forced with ERA40 reanalysis).

| Productor | GCM               | RCM           | Initialisation | RCP 2.6 | RCP 4.5 | RCP 8.5 |
|-----------|-------------------|---------------|----------------|---------|---------|---------|
| CLM-com   | CNRM-CM5          | CCLM4-8-17    | 1950           |         | X       | X       |
| CLM-com   | ICHEC-EC-EARTH    | CCLM4-8-17    | 1950           |         | X       | X       |
| CLM-com   | MOHC-HadGEM2-ES   | CCLM4-8-17    | 1981           |         | X       | X       |
| CLM-com   | MPI-ESM-LRC       | CCLM4-8-17    | 1950           |         | X       | X       |
| CNRM      | CNRM-CM5          | CNRM-ALADIN53 | 1950           |         | X       | X       |
| IPSL      | IPSL-IPSL-CM5A-MR | WRF331F       | 1951           |         | X       | X       |
| KNMI      | MOHC-HadGEM2-ES   | RACMO22E      | 1981           | X       | X       | X       |
| CSC       | MPI-ESM-LR        | REMO019       | 1950           | X       | X       | X       |
| SMHI      | CNRM-CM5          | RCA4          | 1970           |         | X       | X       |
| SMHI      | ICHEC-EC-EARTH    | RCA4          | 1970           | X       | X       | X       |
| SMHI      | IPSL-IPSL-CM5A-MR | RCA4          | 1970           |         | X       | X       |
| SMHI      | MOHC-HadGEM2-ES   | RCA4          | 1981           |         | X       | X       |
| SMHI      | MPI-ESM-LR        | RCA4          | 1970           |         | X       | X       |

**Table S1.** List of climatic simulations

## SMB measurement on the tongue

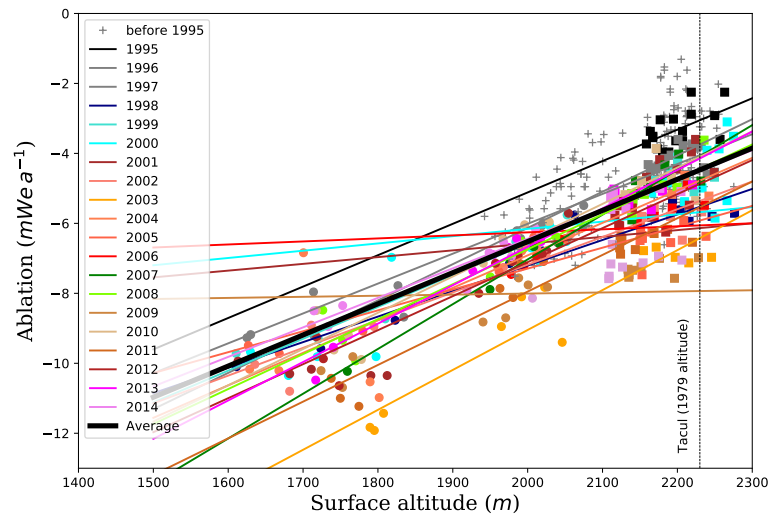

**Figure S1.** Surface mass balance (ablation) observed on the tongue of Mer de Glace. Linear regression is plotted for each year from 1995 to 2014. Average gradient for this period is plotted in thick black line.

### 3D mesh

The 3D mesh is constructed from the vertical extrusion of a 2D footprint that covers the 1905 extension of the glacier up to the Leschaux and Tacul boundaries. In this way, the glacier is allowed to advance up to its 1905 maximal extension. The 2D footprint is meshed with unstructured triangular elements at a spatial resolution of 50 m. Tests were performed with 6 and 10 extruded layers and do not show significant sensitivity to the vertical resolution. With six vertical layers, the resulting 3d mesh contains 32,784 nodes. The initial upper surface elevation at the mesh nodes is obtained from a cubic-spline interpolation (Haber et al., 2001) of the 1979 surface DEM. Bedrock elevation at the mesh nodes is obtained using natural-neighbour interpolation (Fan et al., 2005) of all available observations presented in S2.

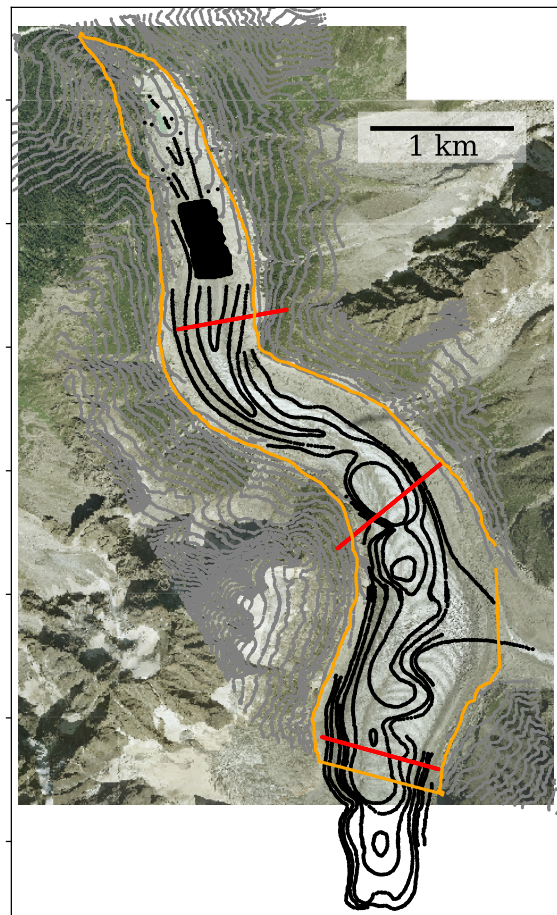

**Figure S2.** Dataset used for the bedrock interpolation. Isoline elevation inferred from mechanical borehole drillings or seismic soundings (Süstrunk, 1951; Vallon, 1961, 1967; Gluck, 1967) are in black and new data obtained during the radar campaign in 2018 (not published) are in red. Unglaciated surface on the border of the glacier, in gray, are from the 2003 surface. The limits of the domain are plotted in orange. The background map of Mer de Glace is an orthophotoplan acquired in 2008 ©RGD74).

## Volume and area evolution

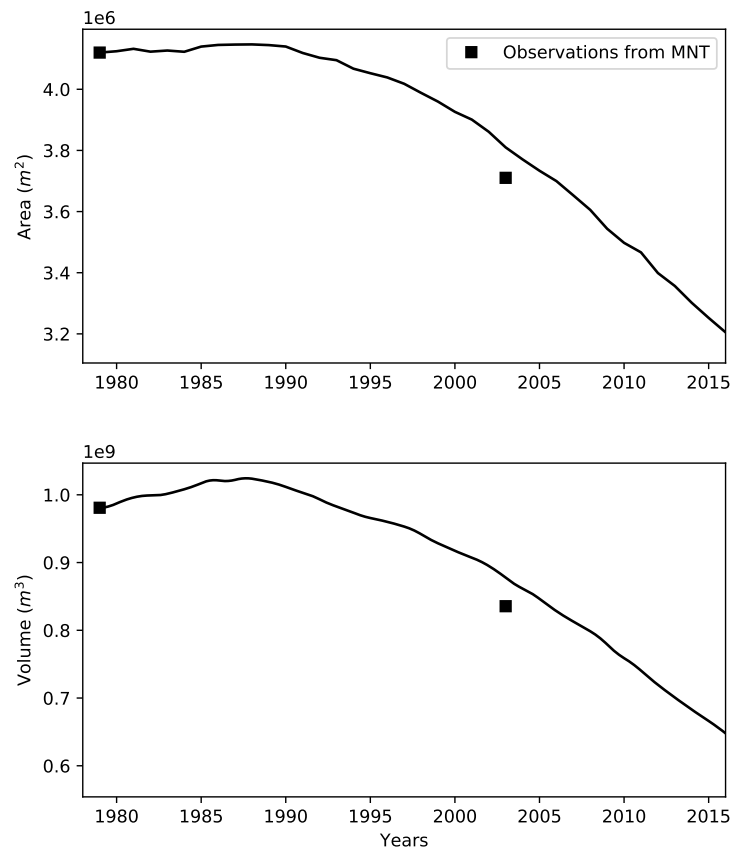

**Figure S3.** Area and volume evolution for the hindcast simulation.

## Sensitivity to the SMB vertical gradient

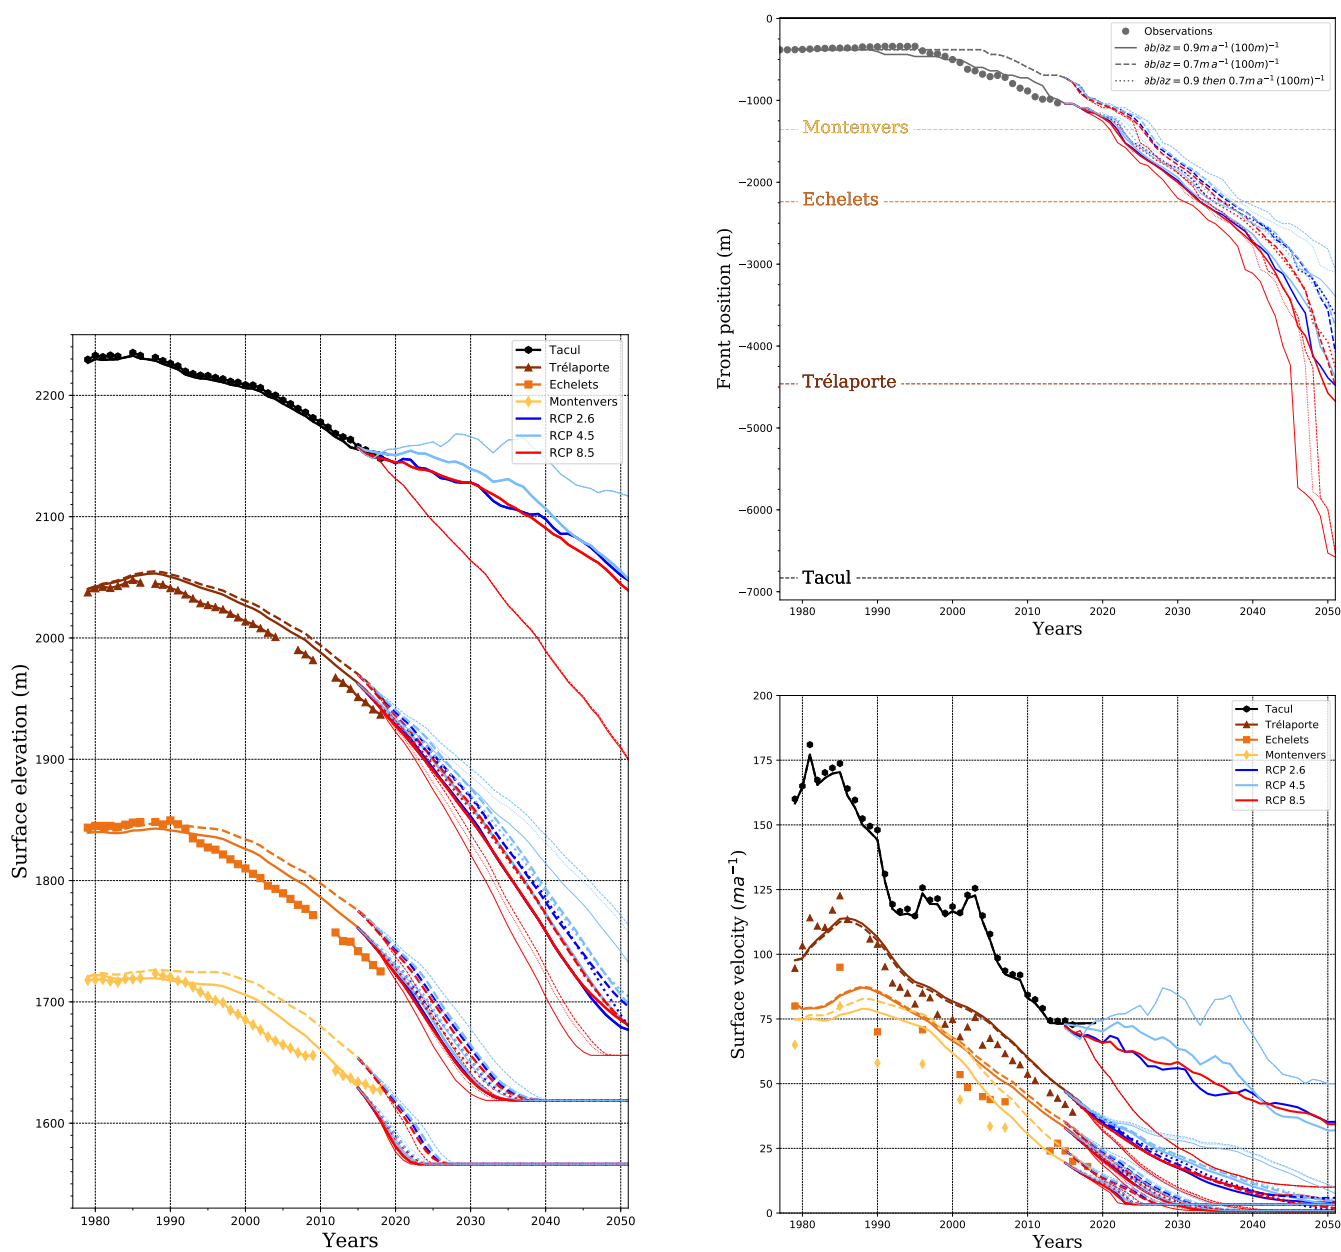

**Figure S4.** Altitude, front and surface velocity evolution for three scenarios with different SMB vertical gradient of  $0.9 \text{ m a}^{-1} (100 \text{ m})^{-1}$  (solid lines)  $0.9$  for hindcast and  $0.7 \text{ m a}^{-1} (100 \text{ m})^{-1}$  for forecast (dotted lines),  $0.7 \text{ m a}^{-1} (100 \text{ m})^{-1}$  (dashed lines). Average RCP scenarios are plotted with thick curves, the extremes scenarios with thin curves.

## References

- Fan, Q., Efrat, A., Koltun, V., Krishnan, S., and Venkatasubramanian, S.: Hardware-assisted natural neighbor interpolation, in: Proceedings of the Seventh Workshop on Algorithm Engineering and Experiments and the Second Workshop on Analytic Algorithms and Combinatorics, ALENEX/ANALCO 2005, 22 January, 2005, Vancouver, BC, Canada. Society for Industrial and Applied Mathematics, Philadelphia, PA, edited by Demetrescu, C., Sedgewick, R., and Tamassia, R., pp. 111–120, 2005.
- Gluck, S.: Détermination du lit rocheux sous la Mer de Glace par sismique-réflexion, C. R. Séances Acad. Sci. (Paris), 264, 2272–2275, 1967.
- Haber, J., Zeilfelder, F., Davydov, O., and Seidel, H. P.: Smooth approximation and rendering of large scattered data set, in: Proceedings of the IEEE Visualization 2001, 21–26 October 2001, San Diego, CA, USA. Institute of Electrical and Electronics Engineers, Piscataway, NJ, 341–347, pp. 341–347, doi:10.1109/VISUAL.2001.964530, 2001.
- Stüstrunk, A. E.: Sondage du glacier par la méthode sismique, Houille Blanche, No. spécial A, pp. 309–318, doi:10.1051/lhb/1951010, 1951.
- Vallon, M.: Épaisseur du glacier du Tacul (massif du Mont- Blanc), C. R. Séances Acad. Sci. (Paris), 252, 1815—1817, 1961.
- Vallon, M.: Contribution à l'étude de la Mer de Glace., Ph.D. thesis, Université de Grenoble, 1967.
